# Supplementary material for: Mild and highly selective hydrogenation of cyclohexyl acetate to cyclohexanol over Cu(i) coordinated amino-functionalized poly(ionic liquid)s
Source: Royal Society of Chemistry journal article supplement (doi:10.1039/d2cy01383e), 2022-01-01
Supplement: d2cy01383e1.pdf [file d2cy01383e1.pdf]

## Supplementary Information

# Mild and highly selective hydrogenation of cyclohexyl acetate to cyclohexanol over Cu (I) coordinated amino-functionalized poly(ionic liquid)s

Binxiong Guang <sup>a</sup>, Wei Zhang <sup>a</sup>, Yiwei Zhang <sup>b</sup>, Yahui Xiao <sup>b\*</sup>, Yong Liu <sup>a\*</sup>

<sup>a</sup> Henan Key Laboratory of Polyoxometalate Chemistry, College of Chemistry and Chemical Engineering, Henan University, Kaifeng, 475004, China

<sup>b</sup> Henan Engineering Research Center of Resource & Energy Recovery from Waste, College of Chemistry and Chemical Engineering, Henan University, Kaifeng 475004, China

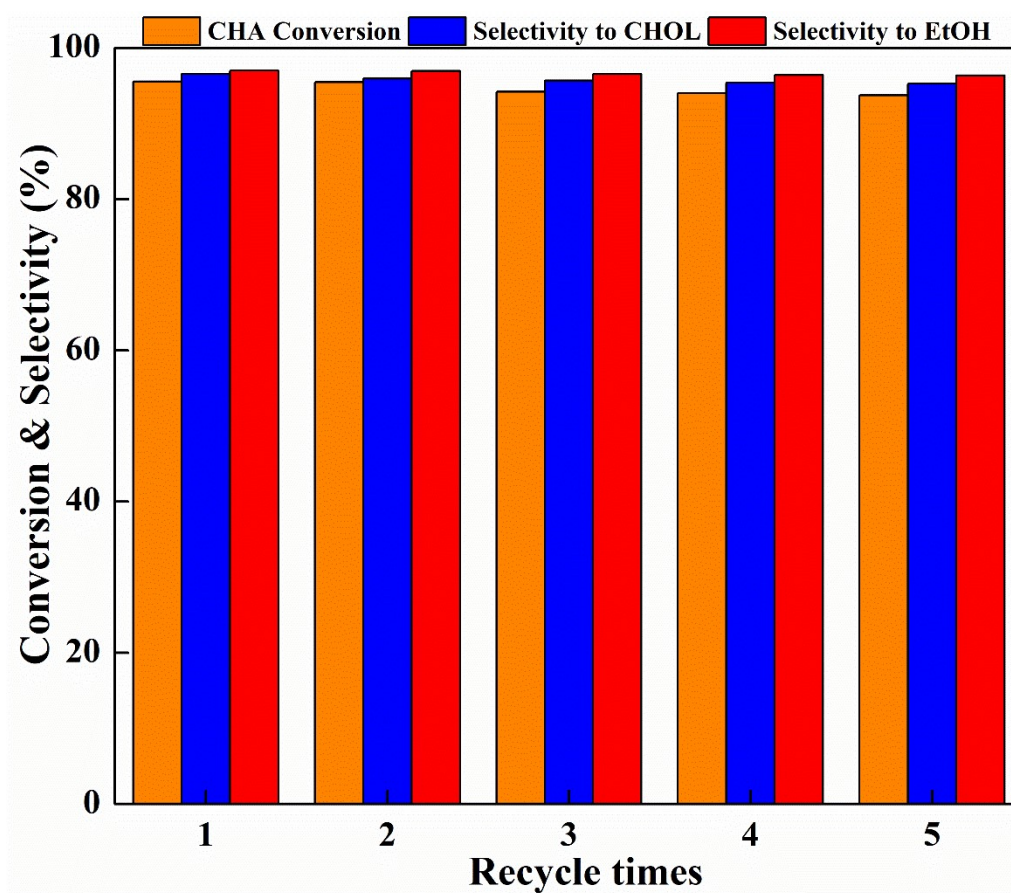

**Fig. S1.** Reusability of the PILs-Cu (I) (mole ratio of K<sub>2</sub>OtBu to CHA 1, 80 °C, 0.1 g catalyst, 2 Mpa H<sub>2</sub> and 18 h).
